# Supplementary material for: Gram-Positive Bacteria-Like DNA Binding Machineries Involved in Replication Initiation and Termination Mechanisms of Mimivirus
Source: MDPI journal article supplement (doi:10.3390/v11030267), 2019-03-17
Supplement: s1 [file s1]

## Supplementary Materials for:

# Gram-positive bacteria-like DNA binding machineries involved in the replication initiation and termination mechanisms of Mimivirus

Motohiro Akashi\* and Masaharu Takemura

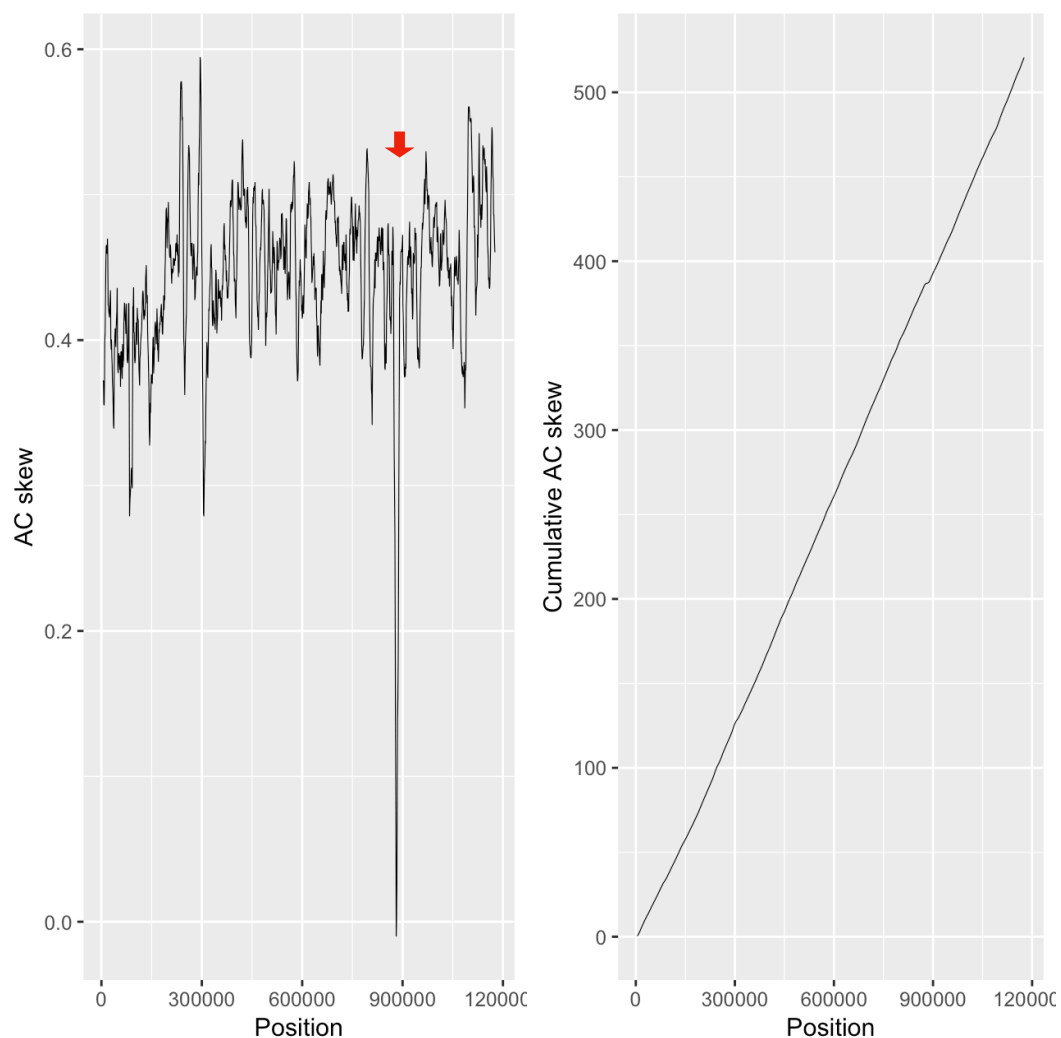

**Figure S1.** AC skew analyses of the *Acanthamoeba polyphaga mimivirus* (APMV) genome. AC skew plot (left) and cumulative AC skew plot (right) of APMV genome (AY653733.1). Red arrows indicate the lowest peak ( $881,000 \pm 5,000$  bp), which corresponds to one of the lowest values on the GC skew plot ( $882,000$  bp).

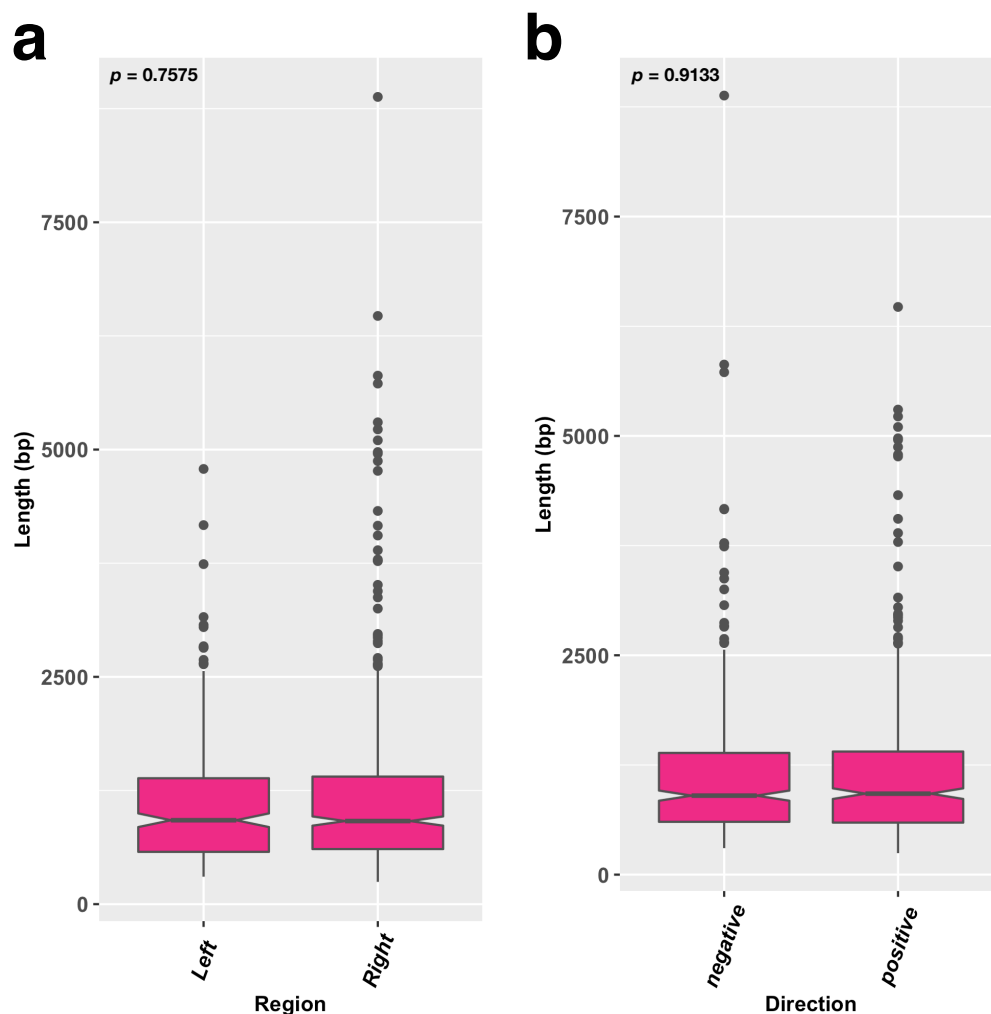

**Figure S2.** Correlation of the coding sequence (CDS) lengths of the left and right sides from the estimated *ori*-region. (a) CDS lengths of the left and right sides from the estimated origin (380,698 bp). (b) CDS lengths of the positive and negative direction in the APMV genome (AY653733.1). The *p*-values on the top left of each graph indicate the statistical differences between each of the two group-based results of a KS test.

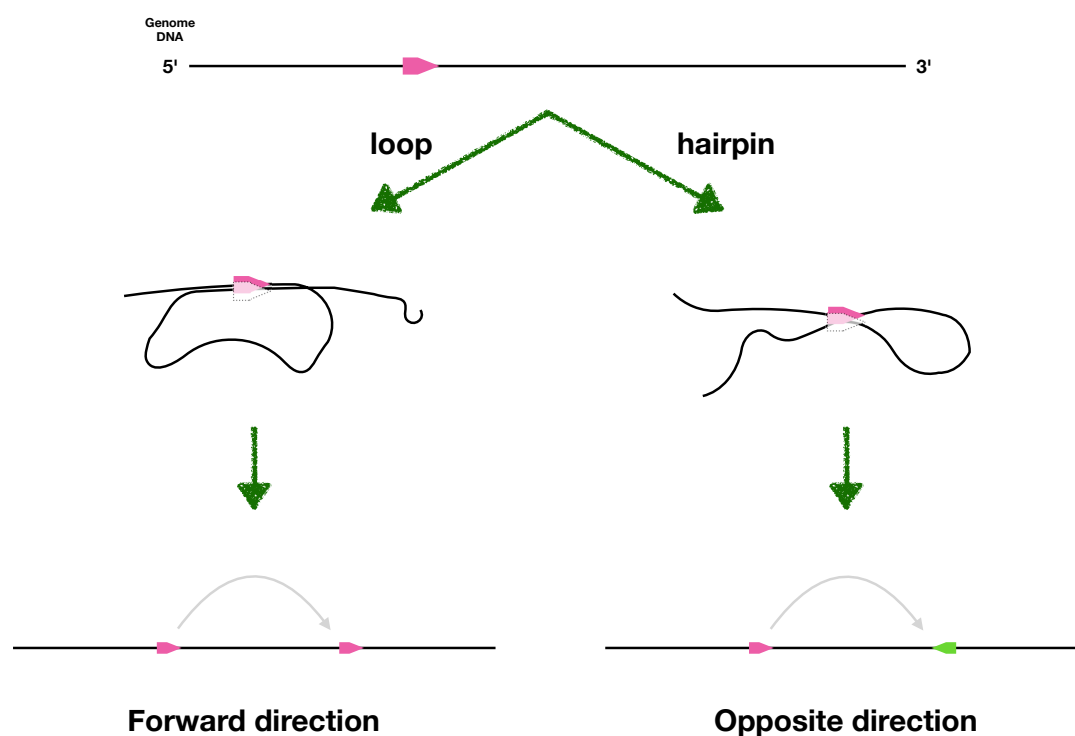

**Figure S3.** Models of the generation of paralogous genes far from each other and their directions on the linear genome. Pink/green arrow indicate paralogous genes with forward/opposite direction. A loop (left) or hairpin (right) structure would cause the generation of paralogous genes with forward or opposite directions via homologous recombination.

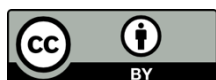

© 2019 by the authors. Submitted for possible open access publication under the terms and conditions of the Creative Commons Attribution (CC BY) license (<http://creativecommons.org/licenses/by/4.0/>).
